# Supplementary material for: First Evidence of Widespread Occurrence and Bioaccumulation of the Antiandrogenic Fluorescent Dye 7-(dimethylamino)-4-methylcoumarin and 7-(dimethylamino)-4-methylcoumarin in Dongjiang River Basin, South China
Source: Preprints.org preprint supplement (doi:10.20944/preprints202410.1441.v1), 2024-10-18
Supplement: Supplementary file 1 [file supplementary]

**Supporting Information**

**First Evidence of Widespread Occurrence and Bioaccumulation of the Antiandrogenic Fluorescent Dye 7-(dimethylamino)-4-methylcoumarin and 7-(dimethylamino)-4-methylcoumarin in Dongjiang River Basin, South China**

Yufeng Lai1, Yin Huang1, Runlin Chen1, Rundong Peng1, Siying Zhang1, Yufei Li1, Guochun Yang2, Yuxian Liu1,*

1 Key Laboratory of Ministry of Education for Water Quality Security and Protection in Pearl River Delta, School of Environmental Science and Engineering, Guangzhou University, Guangzhou 510006, China

2 Department of Psychological and Brain Sciences, University of Iowa, Iowa City, IA 52242, USA.

*Corresponding author

Yuxian Liu, PhD, Guangzhou University, Guangzhou, 510006, China

Email: liuyuxian@gzhu.edu.cn

Submission to**:** *Toxics*

**Supporting Information contains 6 pages which including 4 tables.**

**Supporting Information Table S1.** The physicochemical properties of the target analytes measured in this study (predicted using the US Environmental Protection Agency’s EPI Suite™).

**Supporting Information Table S2.** Retention time, MRM transition and mass spectrometric parameters of coumarins.

**Supporting Information Table S3.** Major parameters for the gradient flow used in the separation of coumarins.

**Supporting Information Table S4.** Quality assurance/quality control (QA/QC) information of coumarins in each matrix.

**Table S1** The physicochemical properties of the target analytes measured in this study (predicted using the US Environmental Protection Agency’s EPI Suite™).

| Compound | Abbreviation | CAS# | Structure | M.W. | Log Kowa | Solubility (mg/L) at 25 ℃b | BAFc | BCFd |
| --- | --- | --- | --- | --- | --- | --- | --- | --- |
| 7-(dimethylamino)-4-methylcoumarin (sublimation purified) | DACM | 87-01-4 |  | 203.24 | 2.24 | 516.9 | 9.661 | 9.661 |
| 7-diethylamino-4-methylcoumarin (sublimation purified) | R-ADMC | 91-44-1 |  | 203.24 | 3.22 | 53.28 | 38.09 | 38.09 |

* Based on experiment database match; a Based on KOWWINTM v1.68 estimate; b Based on WSKOWWINTM v1.42; c & d Based on BCFBAFTM v3.01.

**Table S2** Retention time, MRM transition and mass spectrometric parameters of coumarins.

| Coumarins | RTa | Q1b | Q3c | DPd | CEe | EPf | CXPg |
| --- | --- | --- | --- | --- | --- | --- | --- |
| Linuron-d6 1 | 15.0 | 255.000 | 160.000 | 106.000 | 27.000 | 8.000 | 14.000 |
| Linuron-d6 2 | 15.0 | 255.000 | 185.000 | 106.000 | 22.000 | 8.000 | 17.000 |
| R-ADMC 1 | 15.0 | 232.000 | 188.000 | 104.000 | 41.000 | 5.000 | 17.000 |
| R-ADMC 2 | 15.0 | 232.000 | 203.000 | 104.000 | 25.000 | 5.000 | 20.000 |
| DACM 1 | 15.0 | 204.000 | 148.000 | 150.000 | 31.000 | 11.000 | 14.000 |
| DACM 2 | 15.0 | 204.000 | 132.000 | 150.000 | 48.000 | 10.000 | 13.000 |

aRT: Retention time (min); bQ1: Precursor ion; cQ3: Product ion; dDP:Declistering Potential; eCE: Collision Energy; fEP: Entrance Potential; gCXP: Cell exit Potential

**Table S3** Major parameters for the gradient flow used in the separation of coumarins.

| Time (min) | Flow rate (mL/min) | Mobile Phase A (%) | Mobile Phase B (%) |
| --- | --- | --- | --- |
| 0 | 0.3 | 98 | 2 |
| 1 | 0.3 | 96 | 4 |
| 6 | 0.3 | 1 | 99 |
| 8 | 0.3 | 1 | 99 |
| 9 | 0.3 | 98 | 2 |
| 10 | 0.3 | 98 | 2 |

*0.1% formic acid in milli-Q water and 0.1% formic acid acetonitrile were separately used as mobile phase A and B.

**Table S4** Quality assurance/quality control (QA/QC) information of coumarins in each matrix.a

|  | DACM | R-ADMC |
| --- | --- | --- |
|  | ***Water samples*** | |
| Recoveries (%) | 63.00 | 63.00 |
| Matrix effect (%) | 87.90 | 91.50 |
| Accuracy (%) | 55.40 | 57.70 |
| Precision (%) | 12.9 | 9.6 |
|  | ***Sediment samples*** | |
| Recoveries (%) | 50.60 | 68.30 |
| Matrix effect (%) | 110.00 | 85.04 |
| Accuracy (%) | 61.16 | 64.30 |
| Precision (%) | 1.67 | 2.62 |
|  | ***Fish Samples*** | |
| Recoveries (%) | 97.96 | 94.14 |
| Matrix effect (%) | 74.27 | 80.05 |
| Accuracy (%) | 72.90 | 75.57 |
| Precision (%) | 16.39 | 14.31 |
|  | ***Plant, Algae and Zooplankton samples*** | |
| Recoveries (%) | 93.47 | 94.93 |
| Matrix effect (%) | 120.42 | 99.07 |
| Accuracy (%) | 112.56 | 94.04 |
| Precision (%) | 3.95 | 3.01 |

*a* For the pre-extraction matrix spike sample, randomly selected samples (n > 3) were spiked with 10 ng of the target analytes and 10 ng Linuron-d6 prior to extraction; for the post-extraction matrix spike sample, the randomly selected samples were spiked with 10 ng Linuron-d6 prior to extraction and 10 ng target analytes prior to reconstitution.
